# Supplementary material
Source: publisher figshare collection journal article supplement (https://acs.figshare.com/ndownloader/files/5898018)
Supplement: Supplementary file 1 [file 5898018]

| MeSH term                                           | tree_node |
|-----------------------------------------------------|-----------|
| Bacterial Infections and Mycoses                    | C01       |
| Virus Diseases                                      | C02       |
| Parasitic Diseases                                  | C03       |
| Neoplasms                                           | C04       |
| Musculoskeletal Diseases                            | C05       |
| Digestive System Diseases                           | C06       |
| Stomatognathic Diseases                             | C07       |
| Respiratory Tract Diseases                          | C08       |
| Otorhinolaryngologic Diseases                       | C09       |
| Nervous System Diseases                             | C10       |
| Eye Diseases                                        | C11       |
| Urologic and Male Genital Diseases                  | C12       |
| Female Genital Diseases and Pregnancy Complications | C13       |
| Cardiovascular Diseases                             | C14       |
| Hemic and Lymphatic Diseases                        | C15       |
| Neonatal Diseases and Abnormalities                 | C16       |
| Skin and Connective Tissue Diseases                 | C17       |
| Nutritional and Metabolic Diseases                  | C18       |
| Endocrine Diseases                                  | C19       |
| Immunologic Diseases                                | C20       |
| Disorders of Environmental Origin                   | C21       |
| Pathological Conditions, Signs and Symptoms         | C23       |
| Mental Disorders                                    | F03       |
